# Supplementary material
Source: ML conference proceedings conference paper supplement (https://openaccess.thecvf.com/content/ICCV2023/html/Heigold_Video_OWL-ViT_Temporally-consistent_ICCV_2023_paper.html)
Supplement: Supplementary file 2 [file Heigold_Video_OWL-ViT_Temporally-consistent_ICCV_2023_supplemental.zip]

## A. Model details

### A.1. Segmentation head

We train a segmentation head on top of the frozen OWL-ViT model solely to enforce the one-output-per-pixel constraint required by the OWTA metric. The segmentation head predicts cropped masks within the bounding boxes predicted by the main model. It consists of a ResNet-26 encoder and Hourglass mask heads as described in [4], trained on Open Images V5 [1, 20].

After training this head on the OWL-ViT model, we apply the same (frozen) head on object queries in Video OWL-ViT (without re-training or fine-tuning) to obtain rough segmentation masks.

Example qualitative segmentation masks are shown in Figure 8.

### A.2. Architecture

We provide an overview of architecture hyperparameters of Video OWL-ViT in Table 7. We use pre-norm [34] in all transformer layers.

### A.3. Data augmentation

We use the following data augmentations for training on TAO-OW: 1) we randomly left-right flip all frames (jointly) in a training clip, 2) we randomly invert the temporal axis, 3) we apply random cropping (jointly across all frames in a clip), and 4) we apply a temporal video mosaic augmentation. All 6-frame clips used for training are randomly sampled from the training videos at 4FPS.

For cropping, we sample a random  $480 \times 640$  crop of the original video and discard bounding boxes if less than 50% of their original box area remains after cropping. For

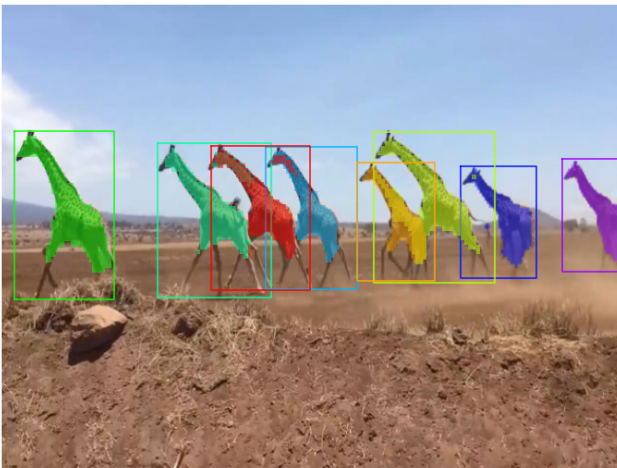

Figure 8: Example of segmentation masks used for enforcing the non-overlap constraint of the OWTA metric.

Table 7: Video OWL-ViT architecture overview.

| Backbone | ViT-L/14          |           |
|----------|-------------------|-----------|
| Decoder  | Layers            | 6         |
|          | Heads             | 8         |
|          | Hidden dim        | 1024      |
|          | MLP size          | 4096      |
|          | QKV dim           | 1024      |
|          | Dropout rate      | 0.1       |
| Box head | MLP size          | 1024      |
|          | MLP hidden layers | 2         |
|          | MLP activation    | GELU [15] |

temporal video mosaic, we take two processed video clips of length 6 (with augmentation as described above), concatenate them along the time axis, and sample a random temporal window of length 6 over the joint sequence. We apply temporal video mosaic to 50% of training samples.

To obtain pseudo-videos from images (incl. individual TAO-OW training frames), we apply a random crop (of size 50% of height and width of the original image) that simulates linear camera motion over the image. We similarly discard bounding boxes if less than 50% of their original box area remains after cropping.

### A.4. Training

We train Video OWL-ViT using the Adam [17] optimizer with  $\beta_1 = 0.9$ ,  $\beta_2 = 0.999$ , and with a batch size of 32 and a learning rate of  $3e-6$  for 100k training steps. We clip gradients to a maximum norm of 1. We linearly “warm up” the learning rate over the first 1k steps and decay it to 0 over the course of training using a cosine schedule.

For our loss, we use the same hyperparameters as OWL-ViT [26], i.e. equal weighting between bounding box, gIoU, and classification losses, and focal loss coefficients of  $\alpha = 0.3$  and  $\gamma = 2$ .

For simplicity, we do not filter class labels in upstream text-image and detection pre-training, i.e. objects of classes that are considered “unknown” in the TAO-OW video tracking setting can appear in static images during training, but are never seen in natural video. We verified that filtering these classes during upstream pre-training has negligible effect on our reported metrics.

## B. Additional results

### B.1. Backbone size

To evaluate the effect of model size, we compare our default Video OWL-ViT model, which uses a ViT-L/14 backbone, to a model variant with a smaller backbone (ViT-B/16 at  $768 \times 768$  resolution). Our results in Table 8 indicate clear

Table 8: **TAO** open world tracking with Video OWL-ViT for different ViT backbone size. All metrics in %.

| ViT  | Resolution | LVIS |      | Known |        |         | Unknown |        |         |
|------|------------|------|------|-------|--------|---------|---------|--------|---------|
|      |            | AP   | APr  | OWTA  | D. Re. | A. Acc. | OWTA    | D. Re. | A. Acc. |
| B/16 | 768        | 27.2 | 20.6 | 55.2  | 64.3   | 48.9    | 41.6    | 48.6   | 37.9    |
| L/14 | 672        | 33.4 | 31.8 | 59.0  | 69.0   | 51.5    | 45.4    | 53.4   | 40.5    |

performance gains when using the larger ViT-L/14 backbone across all metrics, incl. upstream LVIS detection performance.

## B.2. Qualitative results

We show further qualitative results of high scoring tracks for Video OWL-ViT and our tracking-by-detection baseline in Figure 9 (TAO-OW) and Figure 10 (YT-VIS). Qualitative results in video format are provided in the supplementary zip file. Video OWL-ViT generally maintains consistent tracks and avoids transfer of instance predictions across semantically different objects compared to our tracking-by-detection baseline.



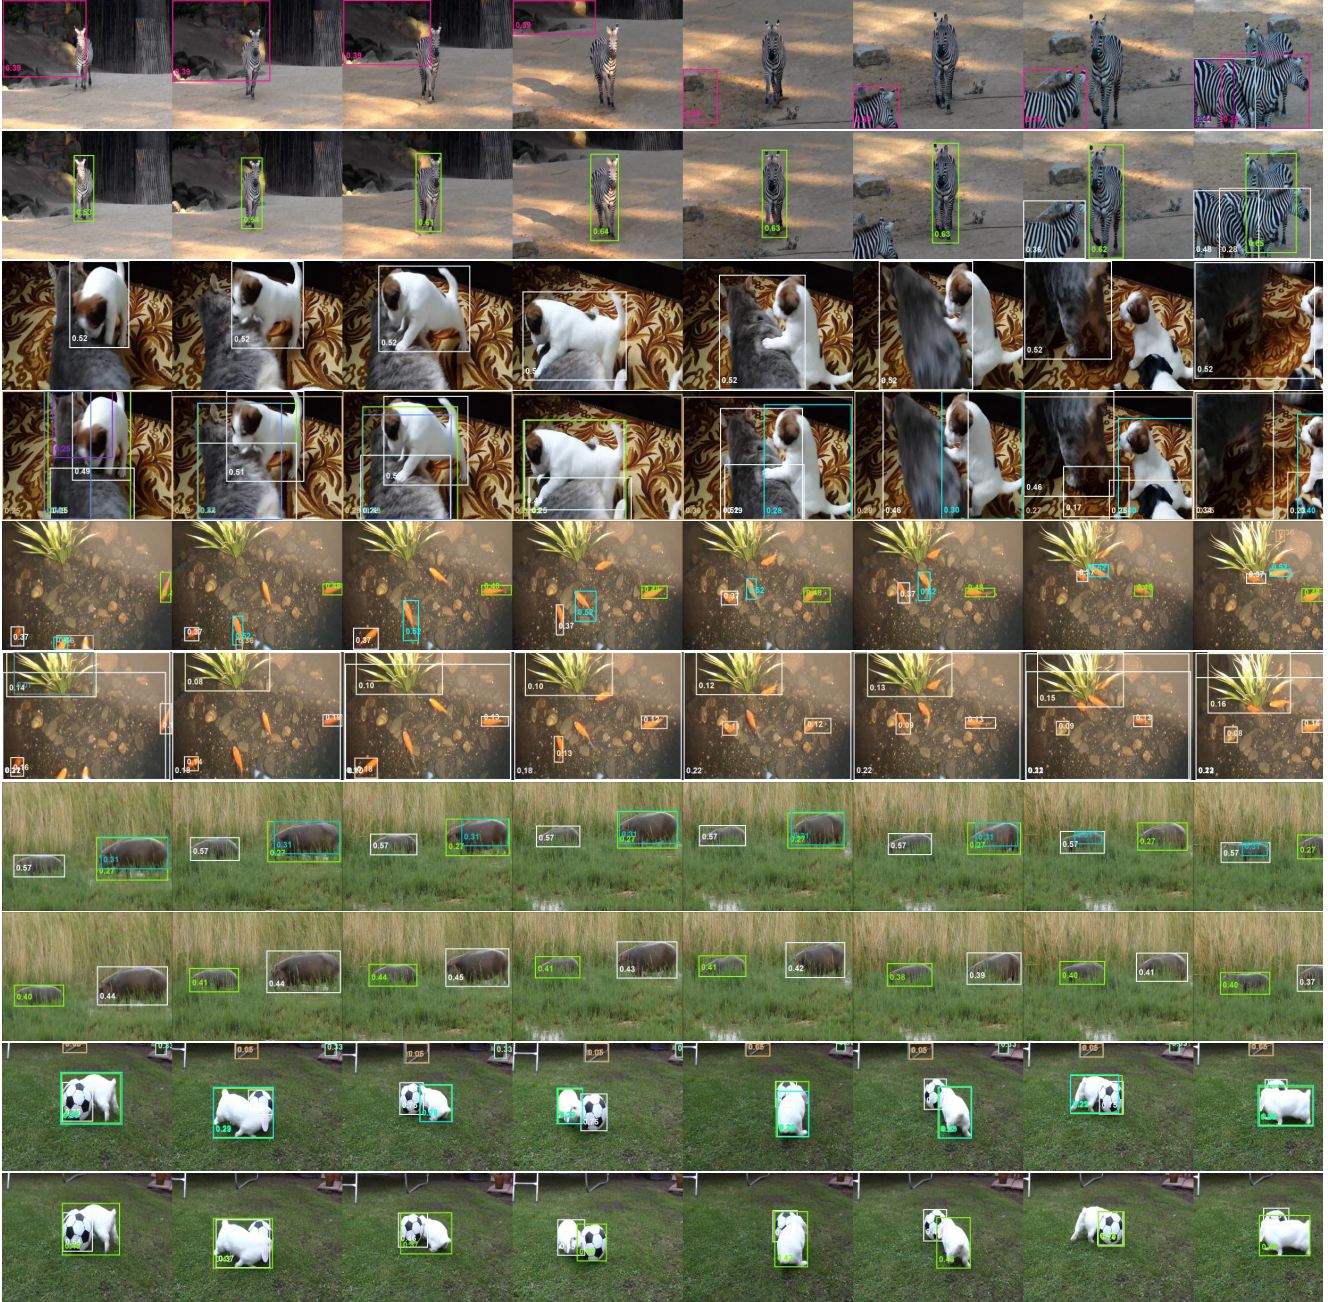

Figure 9: Qualitative examples for Video OWL-ViT detection and tracking of multiple instances on the **TAO-OW** validation set. Tracking-by-detection (odd rows) vs Video OWL-ViT (even rows). Known classes include: cat, dog, zebra. Unknown classes include: fish, rabbit, hippopotamus. Colors uniquely correspond to query IDs. Numbers indicate objectness scores. Only the first 6 frames/seconds of each video are shown.



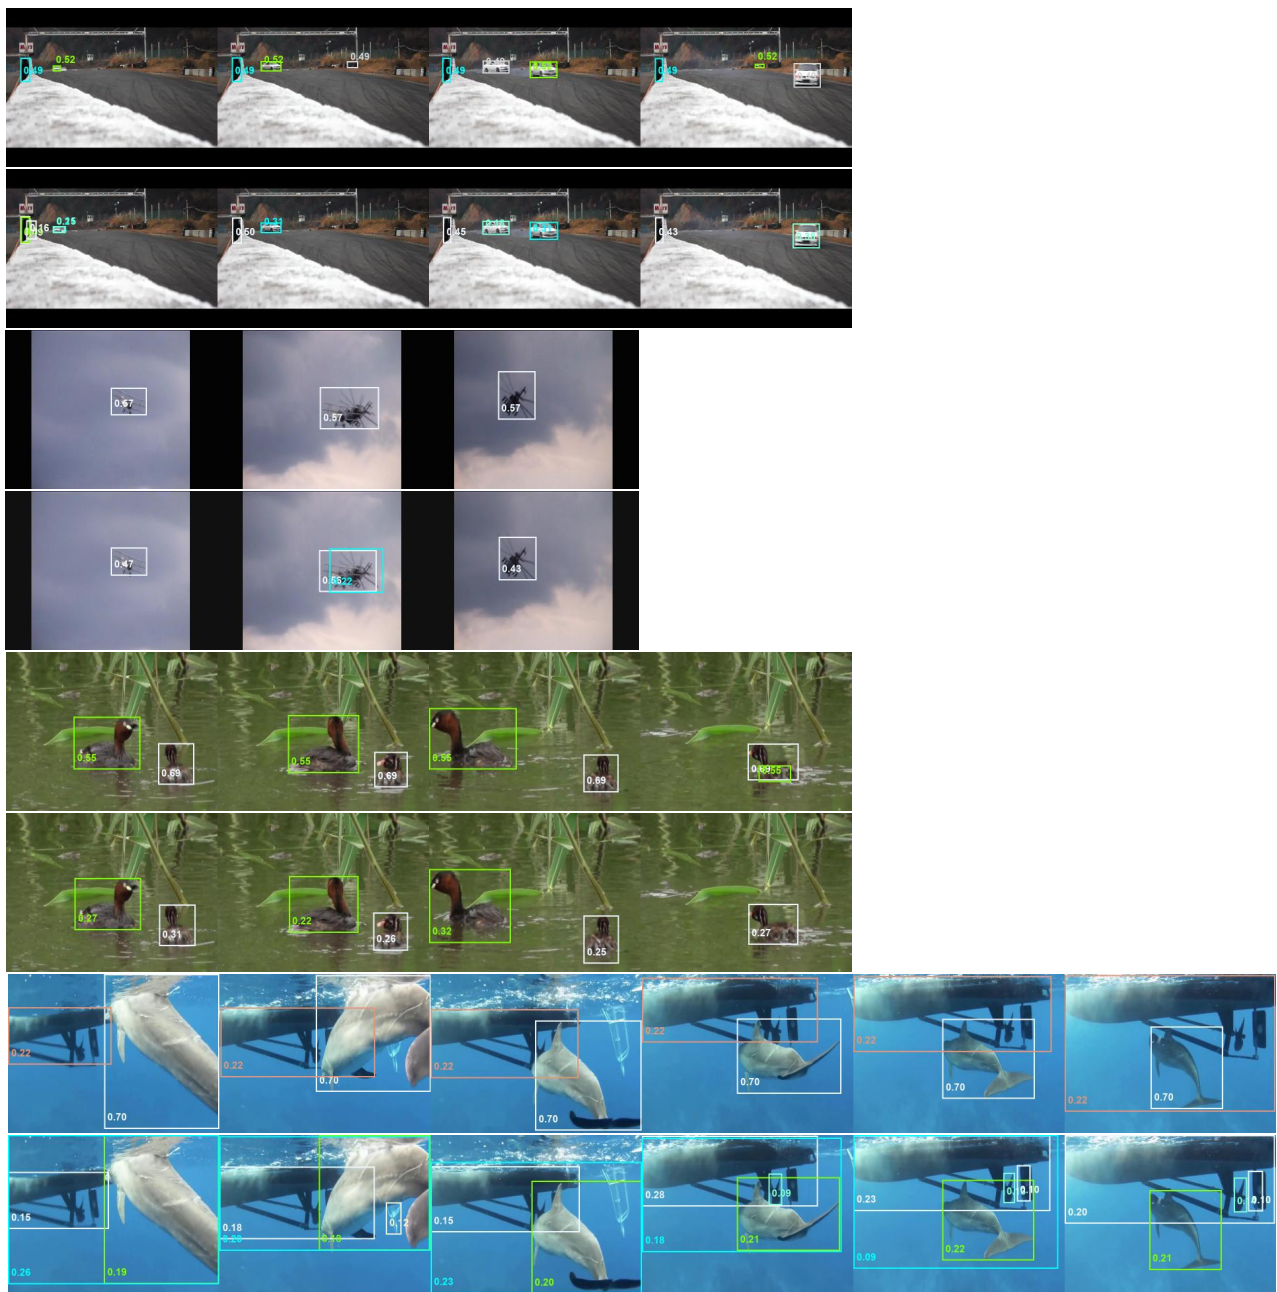

Figure 10: Qualitative examples for Video OWL-ViT detection and tracking of multiple instances on the **YT-VIS** validation/test sets. Tracking-by-detection (odd rows) vs Video OWL-ViT (even rows). Known classes include: dog, car, airplane. Unknown classes include: duck, shark. Colors uniquely correspond to query IDs. Numbers indicate objectness scores. The video clips are shown at a reduced frame rate (1 FPS).
